# Supplementary material
Source: PubMed Central journal article supplement (PMC6859187)

**Supplemental Figure 1: Representative saturation curves for <sup>35</sup>S-BSP uptake by HeLa cells stably transfected with rOATP1A1, rOATP1A4, or both 4 or 24 hrs after induction of transporter expression or in uninduced controls.** Uptake of <sup>35</sup>S-BSP was determined as described in Methods for uninduced HeLa cells (panels A and B), and cells incubated with zinc for 4 hrs (C and D) or 24 hrs (E and F). Data were fit to the equation  $v = \frac{v_{max}[S]}{K_m + [S]} + a[S]$  where  $v$  is the initial rate of uptake of <sup>35</sup>S-BSP,  $[S]$  is the concentration of <sup>35</sup>S-BSP, and  $a$  is a linear term representing non-carrier mediated diffusional uptake as described in Methods. Representative studies are shown and fit parameters are provided in the boxes in each figure. Y-axis scales have been kept constant for all studies. Appropriate protein expression in zinc-induced cells was confirmed by immunoblot.

**Supplemental Figure 2: Representative saturation study of uptake of <sup>35</sup>S-BSP by HEK293 cells transiently transfected with mEGFP-rOATP1A1.** Uptake of <sup>35</sup>S-BSP was determined as described in Methods. Data were fit to the equation  $v = \frac{v_{max}[S]}{K_m + [S]} + a[S]$  where  $v$  is the initial rate of uptake of <sup>35</sup>S-BSP,  $[S]$  is the concentration of <sup>35</sup>S-BSP, and  $a$  is a linear term representing non-carrier mediated diffusional uptake as described in Methods. Fit parameters are shown in the box.

**Supplemental Figure 3: Time dependent uptake of <sup>3</sup>H-digoxin by HeLa cells stably transfected with rOATP1A1, rOATP1A4, or both.** Cells were incubated with or without zinc for 24 hrs and uptake over time of 0.1  $\mu$ M <sup>3</sup>H-digoxin was determined as described in Methods. Appropriate protein expression in zinc-induced cells was confirmed by immunoblot. Three representative experiments for each cell line are shown: Panels A-C rOATP1A1; Panels D-F

rOATP1A4; and Panels G-I rOATP1A1 coexpressed with rOATP1A4. Uptake by uninduced cells is represented by circles, and uptake by induced cells is represented by squares.

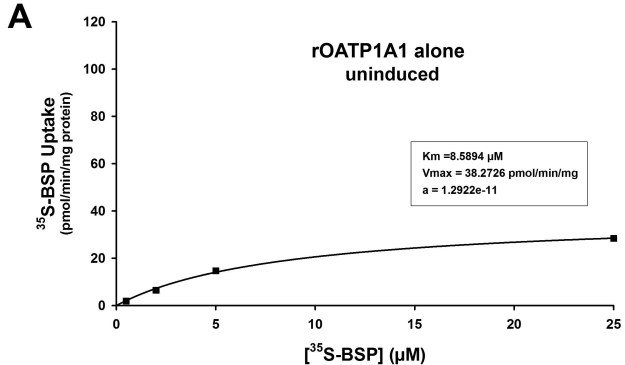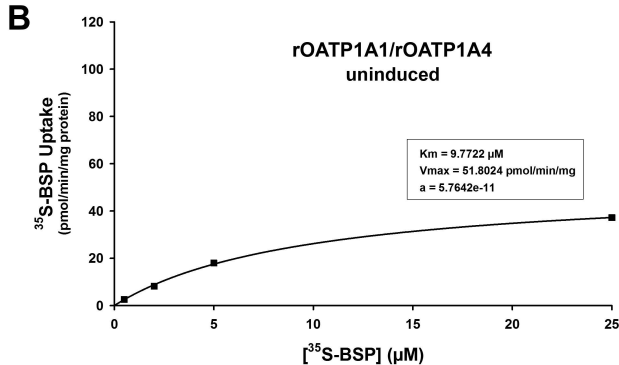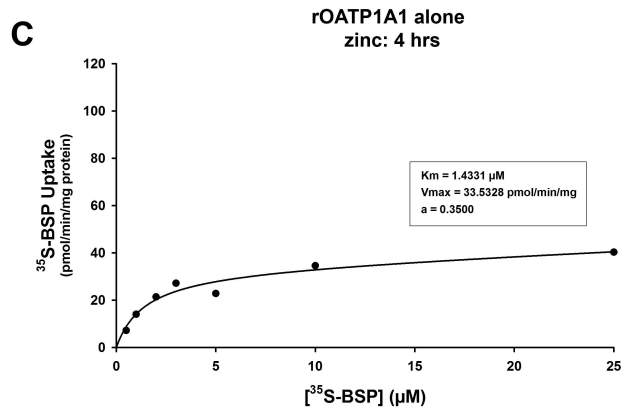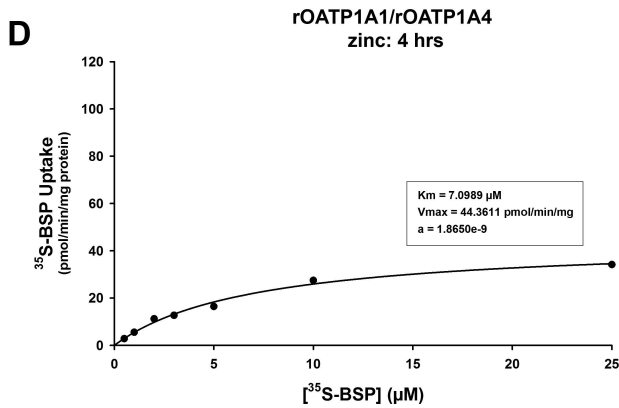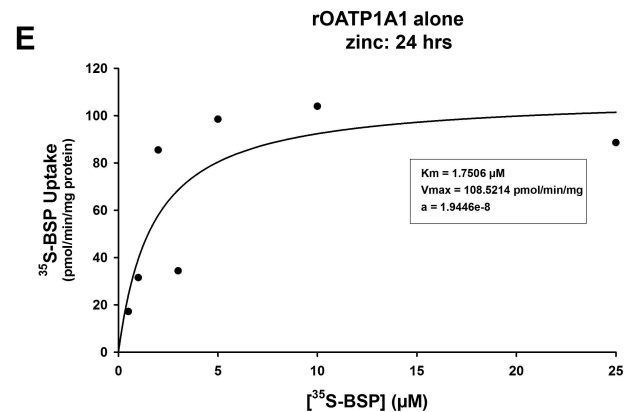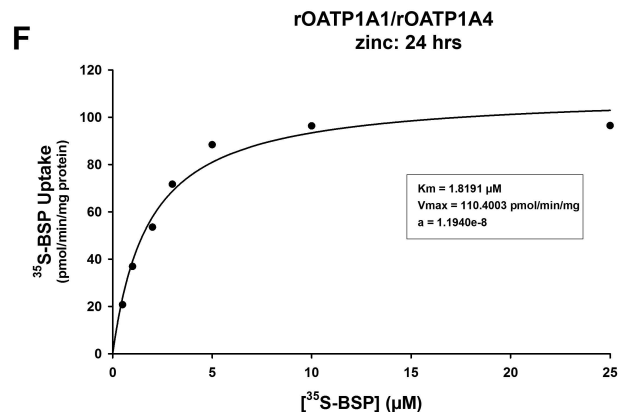

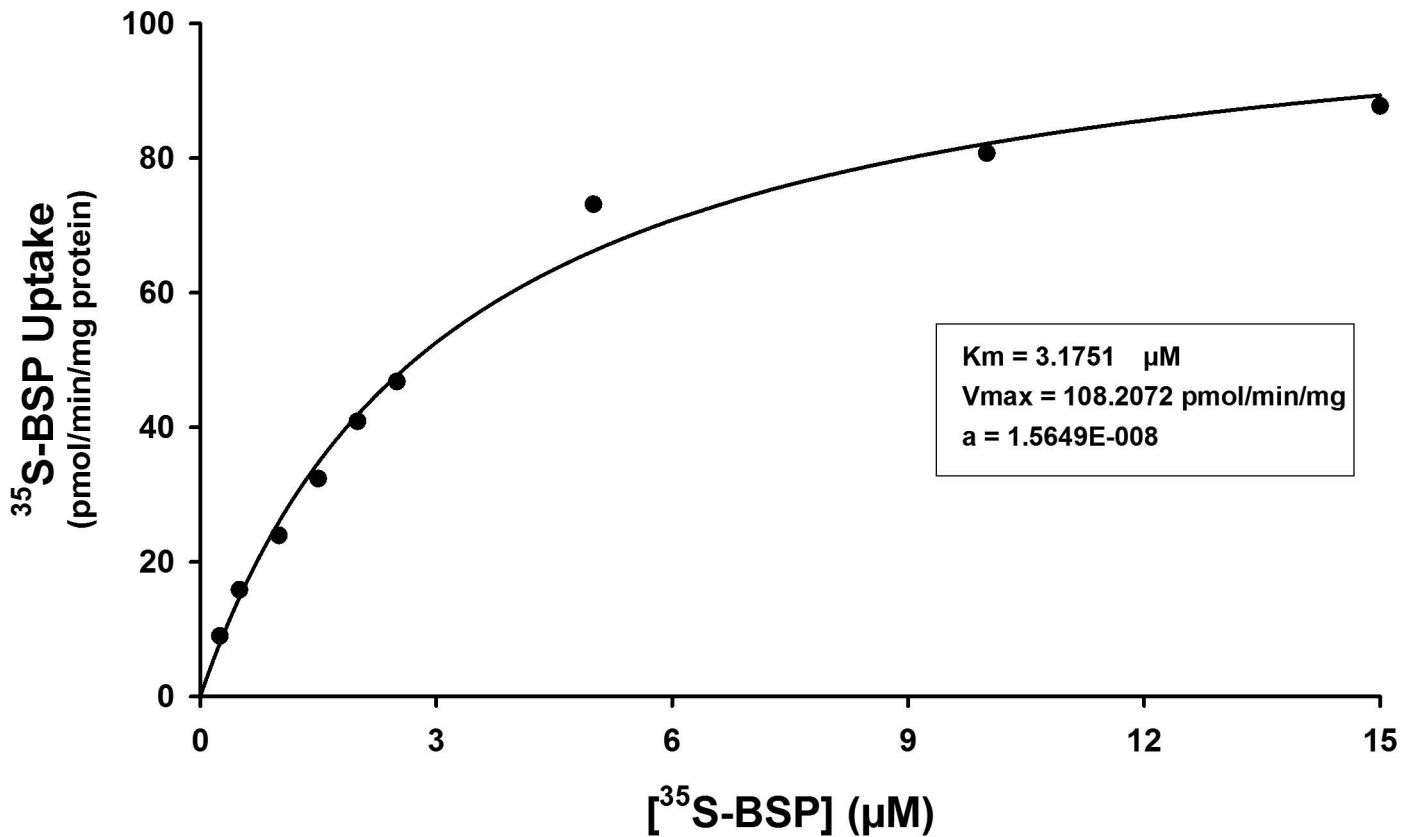

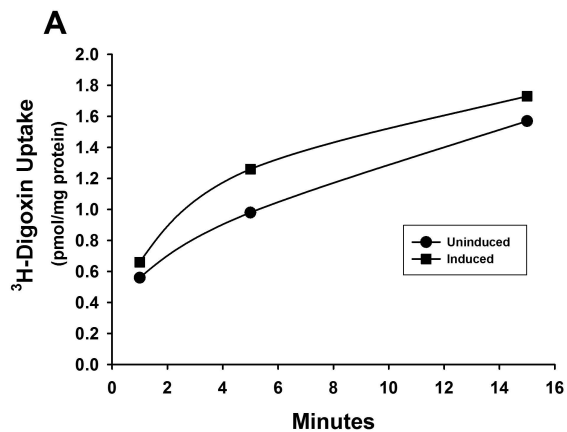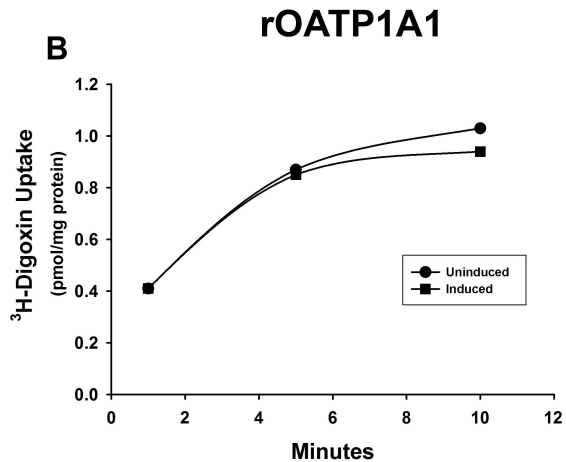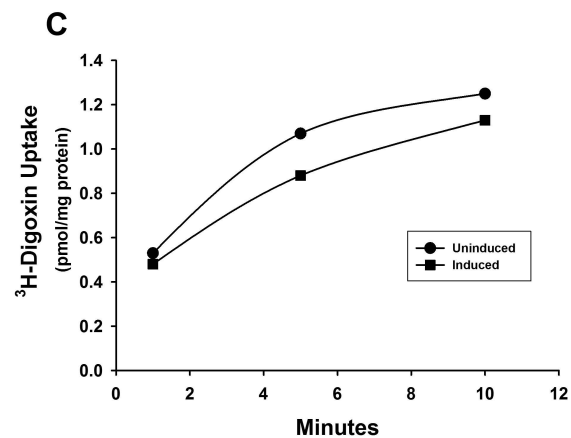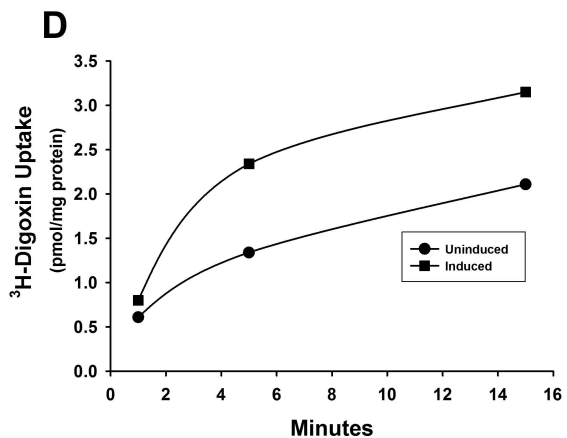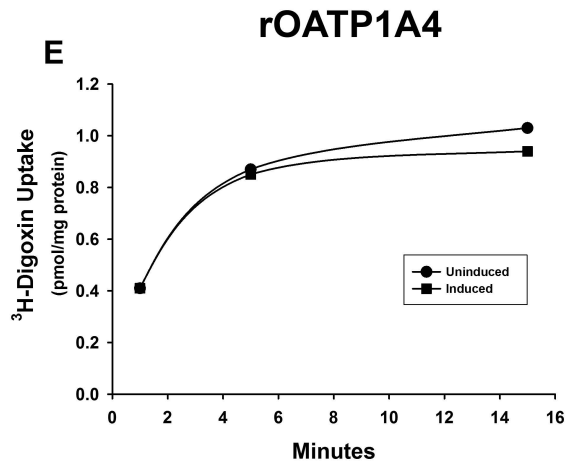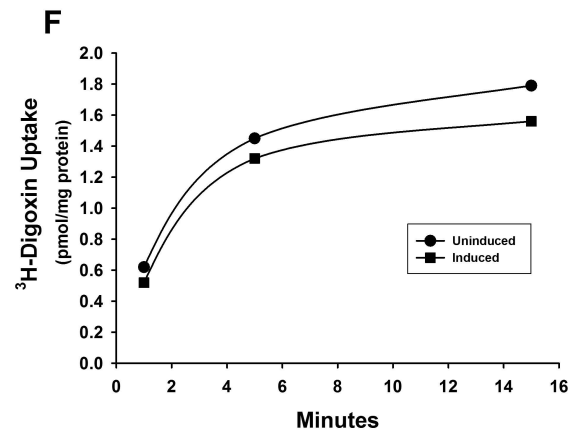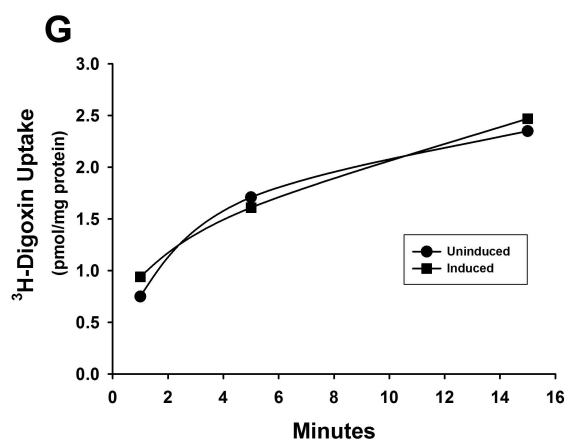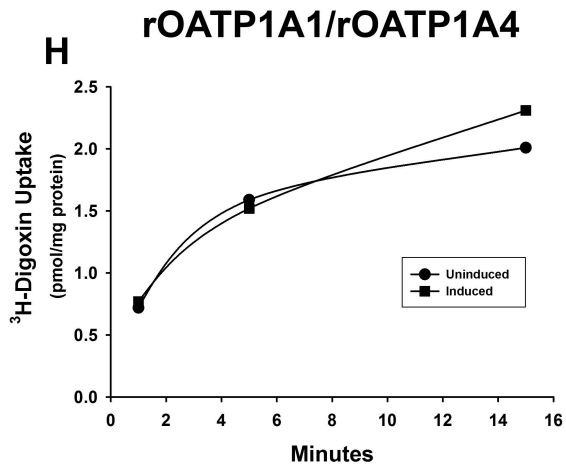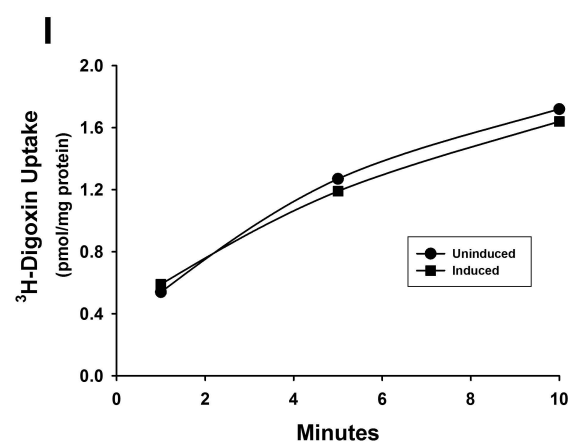

Supplement: NIHMS1030154-supplement-Supp_figS1-3.pdf [file NIHMS1030154-supplement-Supp_figS1-3.pdf]
